# Supplementary material for: Controllable synthesis and evolution mechanism of tungsten bronze nanocrystals with excellent optical performance for energy-saving glass
Source: Royal Society of Chemistry journal article supplement (doi:10.1039/c8tc02740d), 2018-01-01
Supplement: c8tc02740d1.pdf [file c8tc02740d1.pdf]

## Supplementary Information

### Controllable Synthesis and Evolution Mechanism of Tungsten Bronze Nanocrystals with Excellent Optical Performance for Energy-Saving Glasses

Xie-Jun Huang,<sup>ab</sup> Jun Bao,<sup>ab</sup> Yue Han,<sup>a</sup> Chang-Wei Cui,<sup>a</sup> Jie-Xin Wang,<sup>abc</sup> Xiao-  
Fei Zeng,<sup>ab\*</sup> Jian-Feng Chen<sup>abc</sup>

*<sup>a</sup> State Key Laboratory of Organic-Inorganic Composites, <sup>b</sup> Research Center of the Ministry of  
Education for High Gravity Engineering and Technology, <sup>c</sup> Beijing Advanced Innovation Center  
for Soft Matter Science and Engineering,  
Beijing University of Chemical Technology, Beijing 100029, PR China*

---

\*Corresponding authors:

Xiao-Fei Zeng, Tel: +86-10-64447274; Fax: +86-10-64423474; E-mail: [zengxf@mail.buct.edu.cn](mailto:zengxf@mail.buct.edu.cn)  
(X.F. Zeng)

**Table S1.** The concentration of cesium and sodium precursors mixed with AMT

| <b>Cesium and sodium precursors</b>                               | <b>Concentration (mmol)</b> | <b>Mol ratio to W</b> |
|-------------------------------------------------------------------|-----------------------------|-----------------------|
| Na <sub>2</sub> SO <sub>4</sub> / Cs <sub>2</sub> SO <sub>4</sub> | 0.066/ 0.132                | 0.11/ 0.22            |
| NaCl/ CsCl                                                        | 0.132/ 0.264                | 0.11/ 0.22            |
| NaAc/ CsAc                                                        | 0.132/ 0.264                | 0.11/ 0.22            |
| NaOH/ CsOH·H <sub>2</sub> O                                       | 0.132/ 0.264                | 0.11/ 0.22            |

**Table S2.** Compositions of tungsten bronze nanoparticles estimated by an X-ray photoelectron spectroscopy and the simulated amount of metal doping.

| <b>Sample</b> | <b>Atomic ratio</b> |            |            |             |             | <b>(Na+Cs)/W mol ratio</b> |                  |
|---------------|---------------------|------------|------------|-------------|-------------|----------------------------|------------------|
|               | <b>W4f</b>          | <b>C1s</b> | <b>O1s</b> | <b>Cs3d</b> | <b>Na1s</b> | <b>Experimental</b>        | <b>Simulated</b> |
| NaCWO-S       | 4.93                | 75.59      | 18.31      | 0.86        | 0.31        | 0.2373                     | 0.239            |
| NaCWO-C       | 4.68                | 77.79      | 16.25      | 1.1         | 0.18        | 0.2735                     | 0.272            |
| NaCWO-A       | 5.29                | 76.05      | 17.2       | 0.94        | 0.52        | 0.2760                     | 0.277            |
| NaCWO-O       | 5.27                | 73.43      | 19.66      | 1           | 0.64        | 0.3112                     | 0.310            |

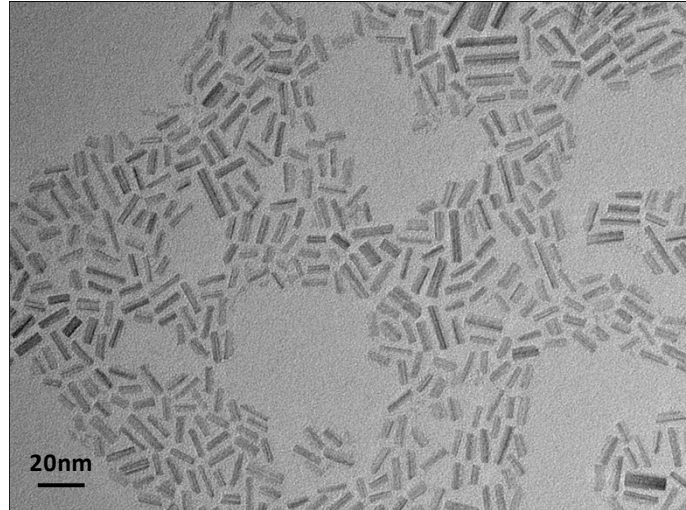

**Fig. S1** TEM image of NaCWO-S nanocrystals reacting for 20 h.

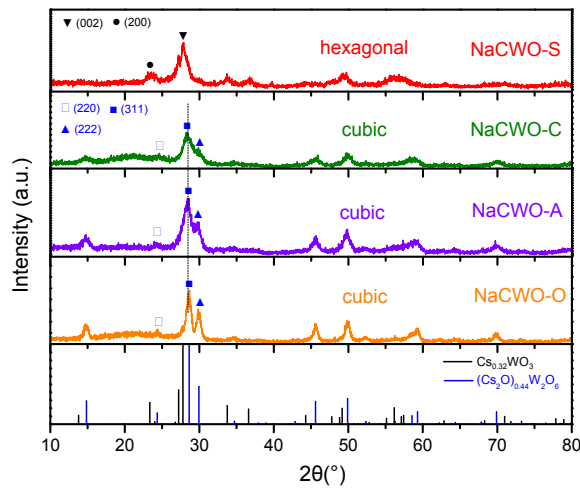

**Fig. S2** XRD of various NaCWO nanocrystals prepared with increased ionic amount (M/W=0.5 mol ratio).

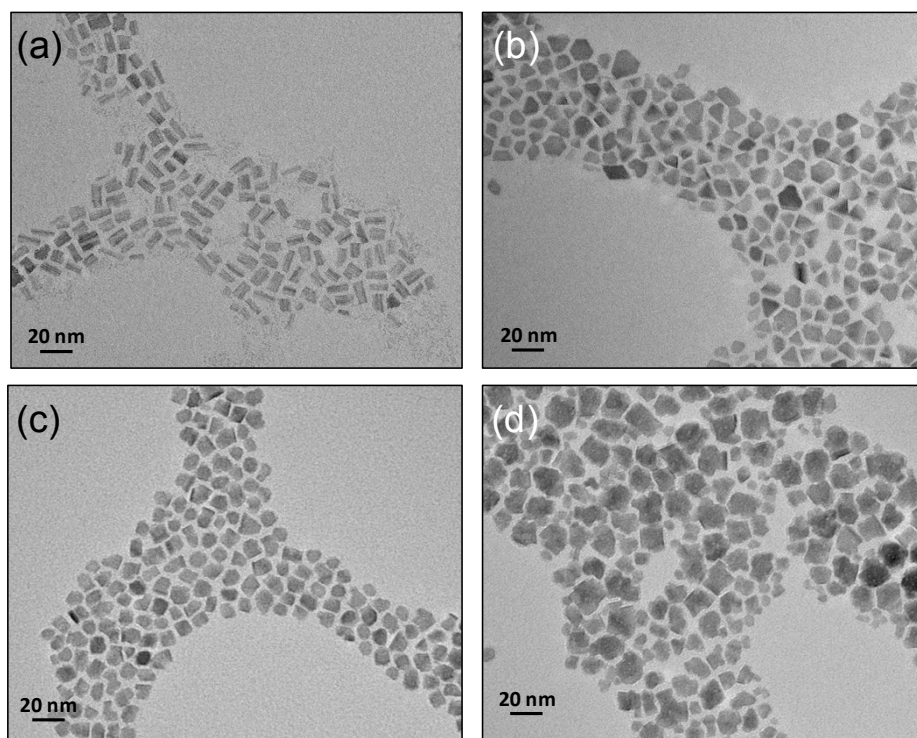

**Fig. S3** TEM images of the NaCWO nanocrystals prepared with increased ionic amount ( $M/W = 0.5$ , mol ratio) at different ligand environments: (a)  $\text{SO}_4^{2-}$ ; (b)  $\text{Cl}^-$ ; (c)  $\text{Ac}^-$ ; (d)  $\text{OH}^-$ .

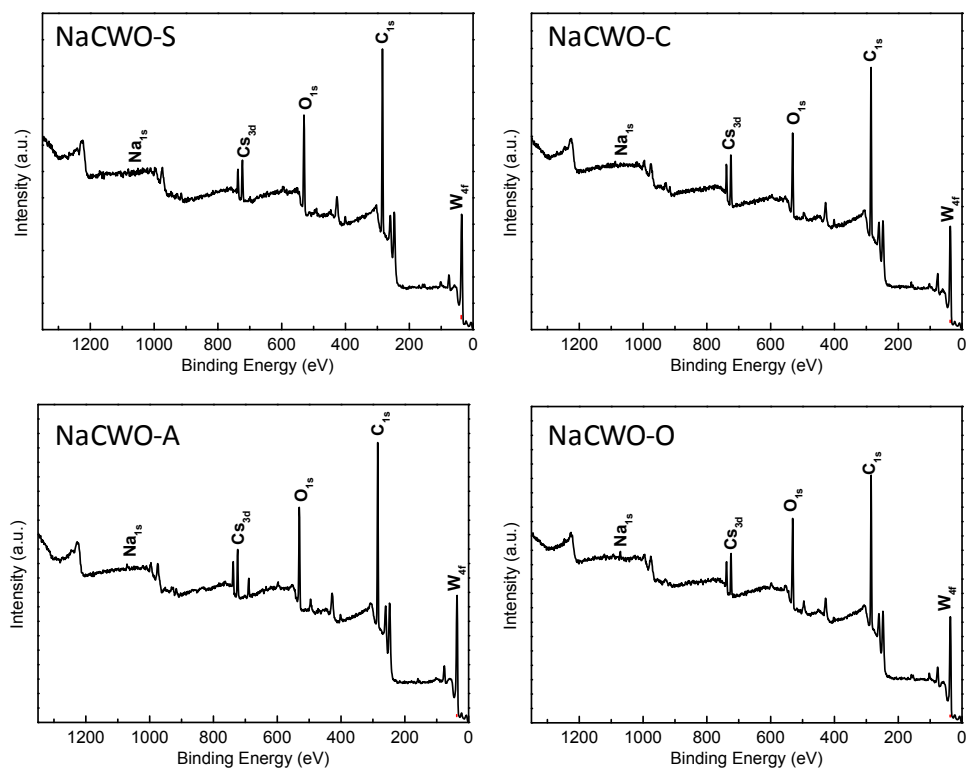

**Fig. S4.** Full range XPS spectra of various NaCWO nanocrystals.

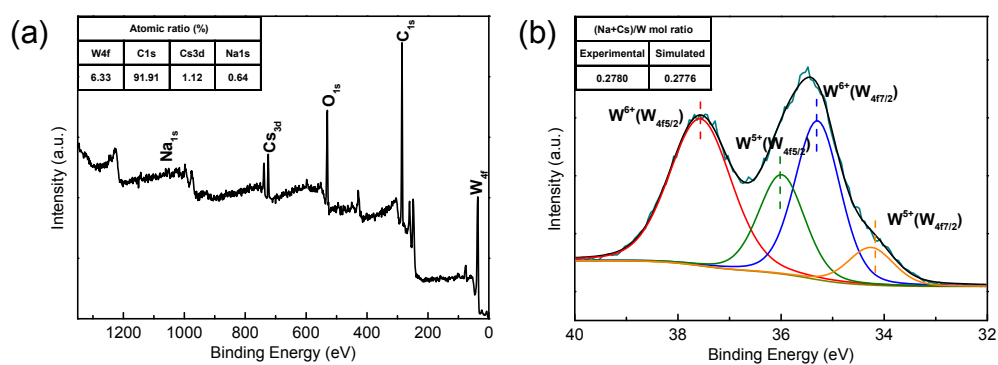

**Fig. S5.** Full range XPS spectra (a) and fitted XPS spectra on W4f core level (b) of NaCWO-S nanocrystals reacting for 20 h.

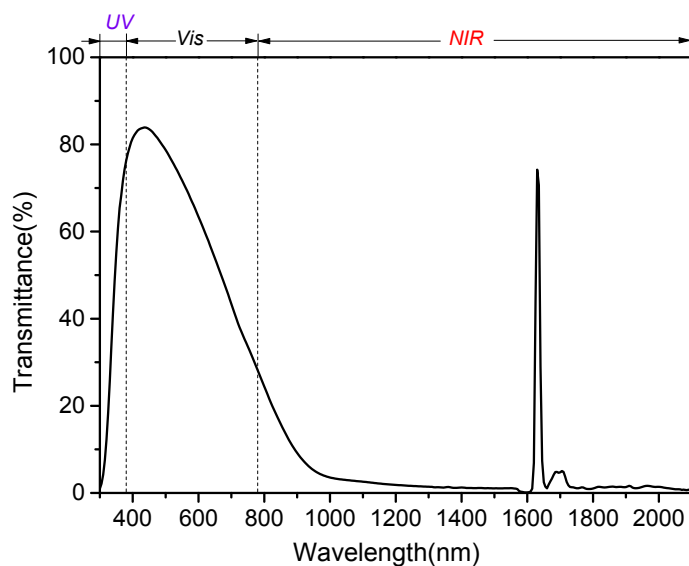

**Fig. S6.** Transmittance spectra of NaCWO-S nanocrystals reacting for 20 h.
